# Supplementary material
Source: PubMed Central journal article supplement (PMC4825116)
Supplement: supp_pp.15.01279_PP2015-01279R1_Supplemental_Material_Fig1_4_and_table.pdf [file supp_pp.15.01279_PP2015-01279R1_Supplemental_Material_Fig1_4_and_table.pdf]

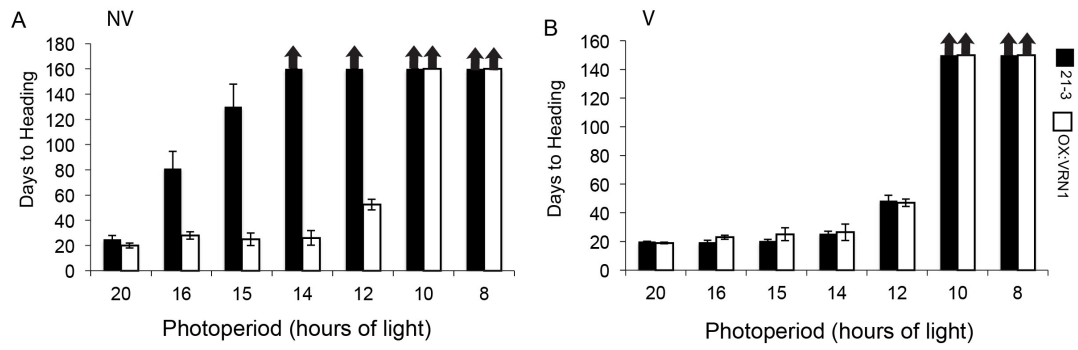

**Supplemental Figure 1.** Days to heading of Bd21-3 and OX:VRN1 lines grown in 20,16, 15,14, 12, 10, and 8 hours of lights. Plants were vernalized (V) as an imbibed seed for 4 weeks before outgrowth in the indicated photoperiods. Non-vernalized (NV) plants and V plants were both moved into the indicated photoperiod at the same time. Arrows indicates that no plants flowered during the course of the experiment.

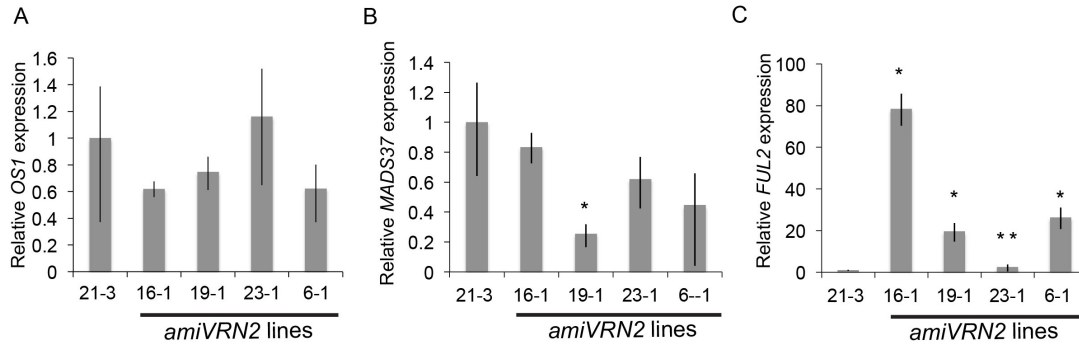

Supplemental Figure 2. *BdOS1*, *BdMADS37* and *BdFUL2* gene expression in leaves of Bd21-3 and *amiVRN2* plants grown in 16h long days without vernalization. qRT-PCR expression data sampled from the youngest leaf at the third leaf stage of Bd21-3 wild-type (WT) and *amiVRN2* plants for *BdOS1* (A), *BdOS2* (B), and *BdFUL2*. Bars represent the average of three biological replicates +/- SD. Expression analysis was repeated with similar results. Single asterisks indicate P-values < 0.01 and two asterisks indicate P value < 0.05.

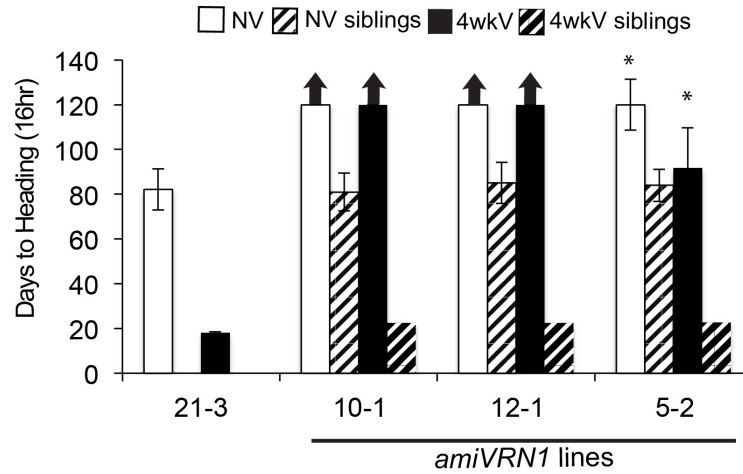

**Supplemental Figure 3.** Days to heading of Bd21-3, and *amiVRN1* plants non-vernalized (NV) and vernalized for 4 weeks (4wkV) at 5°C at the 3rd leaf stage in a 16-h photoperiod before outgrowth for 120 days in a 16-h photoperiod. Arrows indicates that no plants flowered during the course of the experiment. Asterisks (\*) indicates that some plants in this treatment did not flower during the course of the 120 day experiment. Siblings are plants segregating from the same primary transformant mother plant that does not carry the transgene.

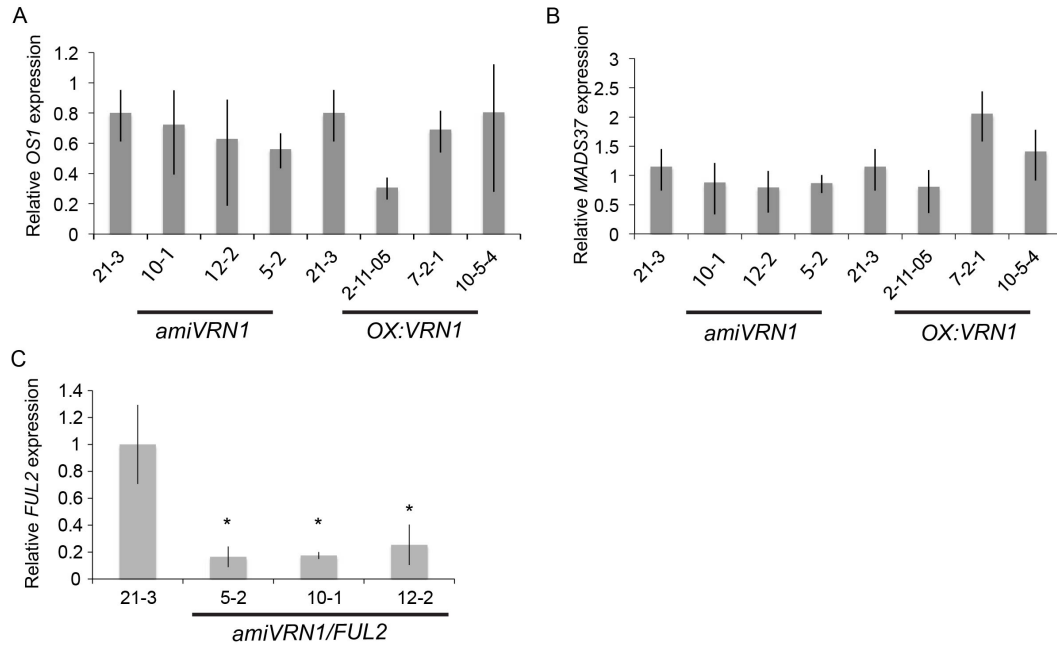

**Supplemental Figure 4.** *BdOS1* (A) and *BdMADS37* (B) gene expression in the youngest leaves of Bd21-3 wild type (WT), *amiVRN1*, and *OX:VRN1* plants at the three leaf stage grown without vernalization under a 20h photoperiod. Bars represent the average of three biological replicates +/- SD. Expression analysis was repeated with similar results. (C) *BdFUL2* gene expression in the third leaf of Bd21-3 and *amiVRN1/FUL2* lines which knockdown mRNA expression of *VRN1* and *FUL2* simultaneously. See Figure 6 for *VRN1* expression in the *amiVRN1/FUL2* lines. Asterisk indicates P value < .05.

## Supplemental Table 1

### **Genotyping overexpression**

pANIC 6 series AcV5 R  
VRN2 cDNA F no cacc  
VRN2 cDNA R no stop

aga cca gcc gct cgc atc ttt cca ag  
ATGTCGACATGTGGCATGTGCG  
TCGGAGCCATCCGAGGTGCGAG

### **amiRNA**

G-11491-GW-attB1-F  
G-11494-GW-attB2 R  
BdVRN2miR-sI-C  
BdVRN2miR-all-C  
BdVRN2miR\*sIII-C  
BdVRN2miR\*aIV-C  
BdVRN1miR-s1-C  
BdVRN1miR-all-C  
BdVRN1miR-s\*III-C  
BdVRN1miR-a\*IV-C  
BdVRN1L1/2miR-sl-271  
BdVRN1L1/2miR-all-271  
BdVRN1L1/2miR-\*sIII-271  
BdVRN1L1/2miR-\*aIV-271

GGGGACAAGTTTTGTACAAAAAAGCAGGGCTCATCGGATCCCAGCAGCCACAGCAAA  
GGGGACCACTTTGTACAAGAAAGCTGGGTCTCGGTACCGCTGCTGATGCTGATGCCAT  
agTACTTGGATCATAGGTACCTGcaggagattcagttga  
tgCAGGTACCTATGATCCAAGTActgctgctctacagcc  
ctCAGGTTCTTTGATCCAAGTAttcctgctctaggctg  
aaTACTTGGATCAAAGGAACTGagagaggcaaaagtga  
agTTTCAGAAATCGACTCGCGCATcaggagattcagttga  
tgATGCGCGAGTCTGATTTCTGAAActgctgctctacagcc  
ctATGCGGGAGACGATTTCTGAAAttcctgctgctaggctg  
aaTTTCAGAAATCGTCTCCCGCATagagaggcaaaagtga  
agTTTCCTATATTCGTGACGCCAcaggagattcagttga  
tgTGGCGTCACGAATATAGGAAActgctgctctacagcc  
ctTGGCGACACCAATATAGGAAAttcctgctgctaggctg  
aaTTTCCTATATTTGGTGTCCCAagagaggcaaaagtga

### **Genotyping amiRNAs**

Universal F amiRNA

ctgatgcatatacatgatggc

### **Phylogenetics**

CO-like\_994f  
CO-like\_1175r

GAGAAGCARATCCGSTAYGMGTC  
CGGAACCAYCCGAGGTSRAG

### **for qPCR**

NassPul\_qVRN2\_f  
NassPul\_qVRN2\_r  
NassPub\_qVRN2\_f  
NassPub\_qVRN2\_alt.r  
Mnutans\_5'\_46F  
Mnutans\_5'\_166R  
A\_sativa\_VRN2\_58F  
A\_sativa\_VRN2\_132R  
Grass\_UBQ5\_F  
Grass\_UBQ5\_R  
Lolium\_EF1alphaF  
Lolium\_EF1alphaR  
BdFUL2 qPCR F1  
BdFUL2 qPCR R1

AGGAAAGCTTACGCCGAGAT  
GGTGGAGTCTGCTTGGATGT  
GGTACGAGTCCAGGAAAGCA  
GAGGTCGAGTCTGCTTGGATGT  
CTGCAGTGGTCTCATTTCCTC  
GTTTGTTCCTCTGGTGGTGT  
CAAATCCGGTATGAGTCAAGAAAA  
ATGTACCTTGGCGAAGCGGCC  
CGCCGACTACAACATCCAG  
TCACCTTCTTGCTTGTGC  
CCTTGCTTGAGGCTCTTGAC  
GTTCCAATGCCACCAATCTT  
CAAGGGCAAGCTCTACGAGT  
AAGAGCCTTTTCAGCATACGA

**Supplemental Figure 5. Alignment of *VRN2/GhD7/CO9* genes and outgroups used for phylogenetic analysis.** Apparent frameshifts in the alignment are due to the removal of unalignable regions, which resulted in higher support values at several nodes, presumably due to reduction of random noise in the data versus true phylogenetic signal. See nexus file.
